# Supplementary material for: Carrageenan of Red Algae Eucheuma gelatinae: Extraction, Antioxidant Activity, Rheology Characteristics, and Physicochemistry Characterization
Source: MDPI journal article supplement (doi:10.3390/molecules27041268), 2022-02-14
Supplement: s1 [file s1]

## Supplementary Materials

# Carrageenan of Red Algae *Eucheuma gelatinae*: Extraction, Antioxidant Activity, Rheology Characteristics, and Physicochemistry Characterization

Hoang Thai Ha <sup>1</sup>, Dang Xuan Cuong <sup>1,2,3,\*</sup>, Le Huong Thuy <sup>4,\*</sup>, Pham Thanh Thuan <sup>5</sup>, Dang Thi Thanh Tuyen <sup>6</sup>,  
Vu Thi Mo <sup>2,3</sup> and Dinh Huu Dong <sup>1</sup>

<sup>1</sup> Department of Food Technology, Ho Chi Minh City University of Food Industry, 700000 Ho Chi Minh, Vietnam

<sup>2</sup> Department of Biology, Graduate University of Science and Technology, VAST, 100000 Ha Noi, Vietnam

<sup>3</sup> Department of organic material from marine resource, Nha Trang Institute of Technology Research and Application, VAST, 650000 Khanh Hoa, Vietnam

<sup>4</sup> Institute of Biotechnology and Food Technology, Industrial University of Ho Chi Minh City, 700000 Ho Chi Minh, Vietnam

<sup>5</sup> General Surgery Department, Ninh Thuan Provincial General Hospital, 59000 Ninh Thuan, Vietnam

<sup>6</sup> Department of Food Science, Nha Trang University, 650000 Khanh Hoa, Vietnam

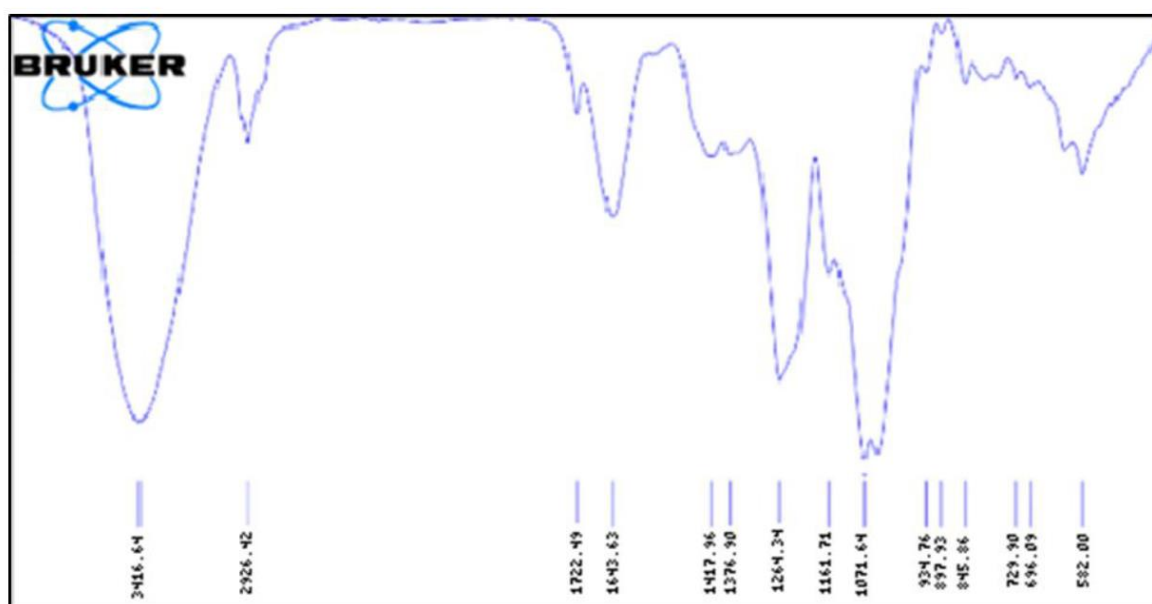

Figure S1. FTIR spectroscopy of antioxidant carrageenan.
